# Supplementary material
Source: publisher figshare collection journal article supplement (https://sage.figshare.com/ndownloader/files/31540141)
Supplement: Supplementary file 1 [file 31540141]

**Supplementary material 4: The Employment-dataset**

Supplement material for Social Position and Functional Somatic Disorders bySigne U. Schovsbo, Thomas M. Dantoft, Betina H. Thuesen, Katja B. Leth-Møller, Lene F. Eplov, Marie W. Petersen, Torben Jørgensen, Merete Osler in Scandinavian Journal of Public Health.

| **The Employment-dataset** | **Overall** |
| --- | --- |
| N | 5301 |
| Age (median [IQR]) | 49.00 [43.00, 55.00] |
| Sex = female (%) | 2920 (55.1) |
| Traditional FSD (%) | 768 (14.5) |
| IBS (%) | 195 (3.7) |
| FM (%) | 241 (4.5) |
| CFS (%) | 514 (9.7) |
| IBS-pure (%)* | 114 (2.5) |
| FM-pure (%)* | 128 (2.7) |
| CFS-pure (%)* | 368 (7.5) |
| BDS (%) | 839 (15.8) |
| Single-organ BDS (%)* | 777 (14.8) |
| Multi-organ BDS (%)* | 62 (1.4) |
| Symptom profiles (%) |  |
| All symptoms profile* | 127 (4.5) |
| Multiple symptoms profiles* | 623 (18.7) |
| Single symptoms profiles* | 1847 (40.6) |
| No symptoms profile* | 2704 (51.0) |
| Cohabitation = non-cohabitating (%) | 1018 (19.2) |
| Vocational training (%) |  |
| Skilled worker or <1 year of vocational training | 2019 (38.1) |
| <3 years of vocational training | 1187 (22.4) |
| 3 - 4 years of vocational training | 1379 (26.0) |
| >4 years of vocational training | 716 (13.5) |
| Employment = Not employed (%) | 425 (8.0) |
| Subjective social status (%) |  |
| Highest | 1665 (31.4) |
| High | 2742 (51.7) |
| Low | 673 (12.7) |
| Lowest | 221 (4.2) |

*Subgroup analysis: Single-organ BDS n=5239, Multi-organ BDS n=4462, IBS-pure: n=4647, FM-pure: n=4661, CFS-pure: n=4901, Single symptom profiles: n=4551, Multiple symptoms profiles: n=3327, All symptoms profile: n=2831.
